# Supplementary material for: Fabrication and characterization of large-scale multifunctional transparent ITO nanorod films
Source: Royal Society of Chemistry journal article supplement (doi:10.1039/c3ta10422b), 2013-01-01
Supplement: c3ta10422b.pdf [file c3ta10422b.pdf]

## Supporting Information

### **Fabrication and characterization of large-scale multifunctional transparent ITO nanorod films**

Hoo Keun Park,<sup>a</sup> Seong Woong Yoon,<sup>a</sup> Won Woo Chung,<sup>a</sup> Byoung Koun Min<sup>b</sup> and Young Rag Do<sup>\*a</sup>

<sup>a</sup>Department of Chemistry, Kookmin University, Seoul 136-702, Korea. Tel: +822-910-4893; E-mail: yrdo@kookmin.ac.kr

<sup>b</sup>Clean Energy Research Center, Korea Institute of Science and Technology, Seoul 136-791, Korea. Tel: +822-958-5853; E-mail: bkmin@kist.re.kr

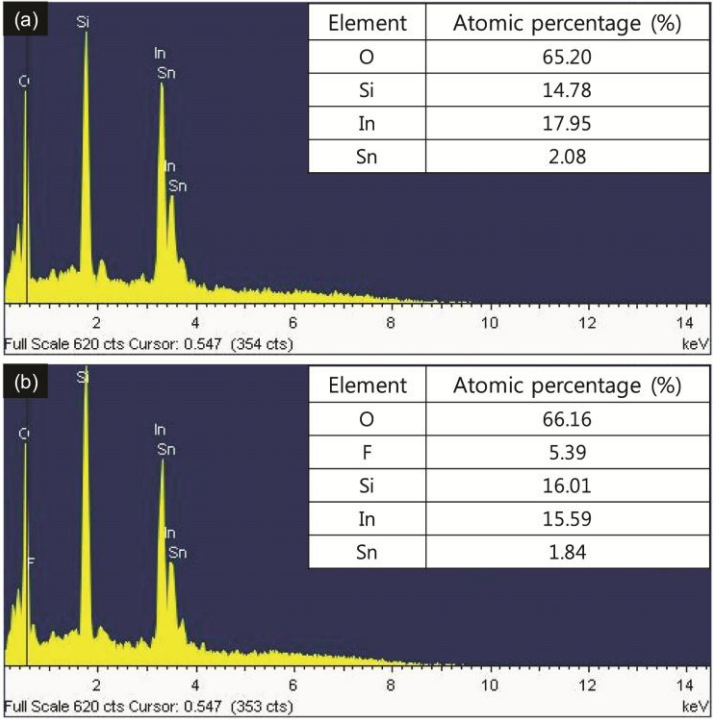

**Fig. S1†** EDS spectra and atomic percentages of contents in the ITO nanorod films: (a) without and (b) with PFS.

***Legends for supplementary videos.***

**Video S1:** Showing the self-cleaning performance of the transparent and superhydrophobic ITO nanorod film with low water adhesion.

**Video S2:** Showing ITO nanorod films with a high contact angle and a near-zero sliding angle on various substrates.
